# Supplementary material for: Stressed out: Bacterial response to high salinity using compatible solute biosynthesis and uptake systems, lessons from Vibrionaceae
Source: PubMed Central journal article supplement (PMC7876524; doi:10.1016/j.csbj.2021.01.030), 2021-02-01
Supplement: mmc1.pdf [file mmc1.pdf]

**Supplementary Data**

**Computational and Structural Biotechnology Journal**

**Mini Review**

**Stressed out: Bacterial response to high salinity using compatible solute biosynthesis and uptake systems, lessons from *Vibrionaceae***

**Gwendolyn J. Gregory and E. Fidelma Boyd\***

*Department of Biological Sciences, University of Delaware, Newark, DE, 19716*

**Table S1.** List of *Vibrio* species with a homology of DddP (KAF0171444 from *Rhodobacteraceae bacterium*) required for dimethylsulfoniopropionate (DMSP) catabolism

| <b>Species</b>                | <b>Coverage</b> | <b>E value</b> | <b>Per. Ident</b> | <b>Acc. Len</b> | <b>Accession</b> |
|-------------------------------|-----------------|----------------|-------------------|-----------------|------------------|
| <i>Vibrio fortis</i>          | 98%             | 6.00E-171      | 53.97%            | 445             | WP_032550763.1   |
| <i>Vibrio splendidus</i>      | 98%             | 9.00E-171      | 54.20%            | 445             | WP_060980452.1   |
| <i>Vibrio mediterranei</i>    | 98%             | 1.00E-170      | 53.74%            | 445             | WP_124941054.1   |
| <i>Vibrio fortis</i>          | 98%             | 2.00E-170      | 53.51%            | 445             | WP_150897716.1   |
| <i>Vibrio harveyi group</i>   | 98%             | 3.00E-170      | 53.74%            | 445             | WP_045372391.1   |
| <i>Vibrio coralliilyticus</i> | 98%             | 3.00E-170      | 53.74%            | 445             | WP_172853848.1   |
| <i>Vibrio</i> sp. Sal10       | 98%             | 3.00E-170      | 54.20%            | 445             | WP_192890274.1   |
| <i>Vibrio</i>                 | 98%             | 5.00E-170      | 53.97%            | 445             | WP_046224773.1   |
| <i>Vibrio nigripulchritu</i>  | 98%             | 2.00E-169      | 52.83%            | 445             | WP_045963477.1   |
| <i>Vibrio nigripulchritu</i>  | 98%             | 3.00E-169      | 52.83%            | 445             | WP_022593153.1   |
| <i>Vibrio orientalis</i>      | 98%             | 3.00E-169      | 53.74%            | 445             | WP_004418477.1   |

**Table S2. Genome context of DddP homolog in *V. coralliilyticus* accession no. NZ\_JABSMU010000002.1**

| Start  | Stop   | Strand | Locus tag     | Protein product | Length | Protein Name                            |
|--------|--------|--------|---------------|-----------------|--------|-----------------------------------------|
| 287271 | 288611 | -      | HRJ43_RS06820 | WP_172853846.1  | 446    | aspartate ammonia-lyase                 |
| 288655 | 290160 | -      | HRJ43_RS06825 | WP_172854017.1  | 501    | aldehyde dehydrogenase                  |
| 290377 | 291261 | +      | HRJ43_RS06830 | WP_172853847.1  | 294    | DddR LysR family regulator              |
| 291467 | 292486 | +      | HRJ43_RS06835 | WP_022593154.1  | 339    | aldo/keto reductase                     |
| 293011 | 294348 | +      | HRJ43_RS06840 | WP_172853848.1  | 445    | <b>DddP M24 family metallopeptidase</b> |
| 294358 | 295959 | +      | HRJ43_RS06845 | WP_172853849.1  | 533    | BCCT transporter                        |
| 296370 | 296966 | +      | HRJ43_RS06850 | WP_172853850.1  | 198    | Integrase tyrosine recombinase          |

**Table S3. Genome context of DddD homolog in *Enterovibrio norvegicus* accession no. NZ\_AJYD02000038.1**

| Start   | Stop    | Strand | Locus tag    | Protein product | Length | Protein Name                                    |
|---------|---------|--------|--------------|-----------------|--------|-------------------------------------------------|
| 1157457 | 1157966 | -      | A1OO_RS13435 | WP_016960442.1  | 169    | gluconokinase                                   |
| 1158042 | 1159358 | -      | A1OO_RS13440 | WP_016960443.1  | 438    | TRAP transporter large permease subunit         |
| 1159351 | 1159911 | -      | A1OO_RS13445 | WP_016960444.1  | 186    | TRAP transporter small permease subunit         |
| 1159989 | 1161005 | -      | A1OO_RS13450 | WP_017003322.1  | 338    | TRAP transporter substrate-binding protein      |
| 1161407 | 1162900 | -      | A1OO_RS13455 | WP_017003323.1  | 497    | DddC CoA-acylating MMSA                         |
| 1162918 | 1164078 | -      | A1OO_RS13460 | WP_017003324.1  | 386    | DddB iron-containing alcohol dehydrogenase      |
| 1164075 | 1165646 | -      | A1OO_RS13465 | WP_016960448.1  | 523    | DddT BCCT family transporter                    |
| 1165926 | 1166855 | +      | A1OO_RS13470 | WP_016960449.1  | 309    | DddR LysR activator                             |
| 1167012 | 1169528 | +      | A1OO_RS13475 | WP_016960450.1  | 838    | DddD Class III CoA transferase_3                |
| 1169622 | 1171052 | -      | A1OO_RS13480 | WP_016960451.1  | 476    | Na <sup>+</sup> /H <sup>+</sup> antiporter NhaC |
| 1171468 | 1171650 | -      | A1OO_RS23045 | WP_083248059.1  | 60     | DUF4260 family protein                          |
| 1171631 | 1172071 | -      | A1OO_RS13485 | WP_016960453.1  | 146    | hypothetical protein                            |
| 1172462 | 1172881 | +      | A1OO_RS13490 | WP_016960454.1  | 139    | D-ribose pyranase                               |

MMSA = methylmalonate-semialdehyde dehydrogenase

**Table S4. Amino acid identity of the betaine-carnitine-choline transporters (BCCTs) in *V. parahaemolyticus*.** VP1456 (BccT1), VP1723 (BccT2), VP1905 (BccT3), and VPA0356 (BccT4), *V. cholerae* OpuD (VC1279/BccT3), and *Escherichia coli* ProP (MSF), PutP (SLC5-SLC-6 protein), and BetT (BCCT) were compared

| % Identity |        |        |        |         |        |      |      |      |
|------------|--------|--------|--------|---------|--------|------|------|------|
| ORF        | VP1456 | VP1723 | VP1905 | VPA0356 | VC1279 | ProP | PutP | BetT |
| VP1456     | 100    | 50.5   | 67.8   | 30      | 67.8   | 43.5 | 25.5 | 37.5 |
| VP1723     | 50.5   | 100    | 52.7   | 29.6    | 49.1   | 26.8 | 27.5 | 35.2 |
| VP1905     | 67.8   | 52.7   | 100    | 30.5    | 81.8   | 38.2 | 23.7 | 35.3 |
| VPA0356    | 30     | 29.6   | 30.5   | 100     | 30.5   | 36.8 | 58.3 | 30   |

## WT, $\Delta proU1\Delta proU2$

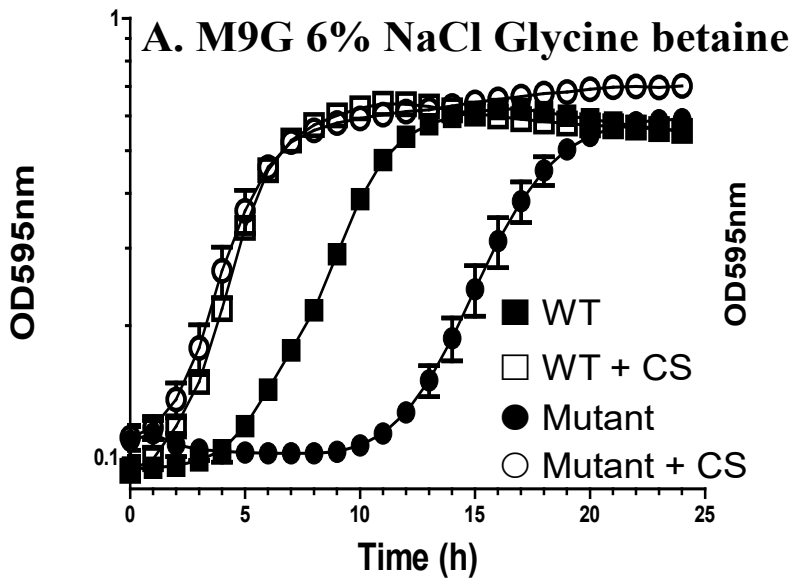

**Fig. S1. Growth analyses of *V. parahaemolyticus* wild type (WT) and  $\Delta proU2\Delta proU1$  double mutant. M9G 6%NaCl+ Glycine betaine (CS). Analyses were performed in triplicate and the data are shown as pooled of two biological replicates.**

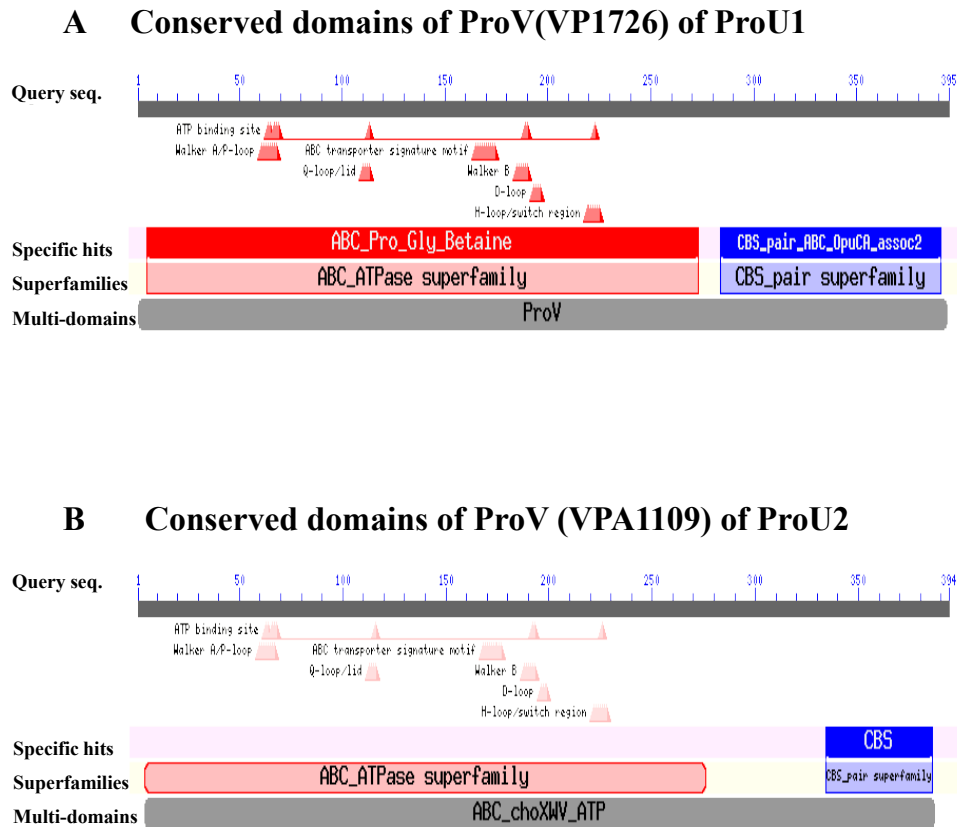

**Fig. S2. Conserved domains of the ProV subunits of the ProU systems.** NCBI Conserved Domain (CDD) Database for the functional annotation of proteins was used for CDD search [203-205].**A.** ATP-binding subunit ProV (VP1726) of ProU1.**B.** ATP-binding subunit ProV (VPA1109) of ProU2.

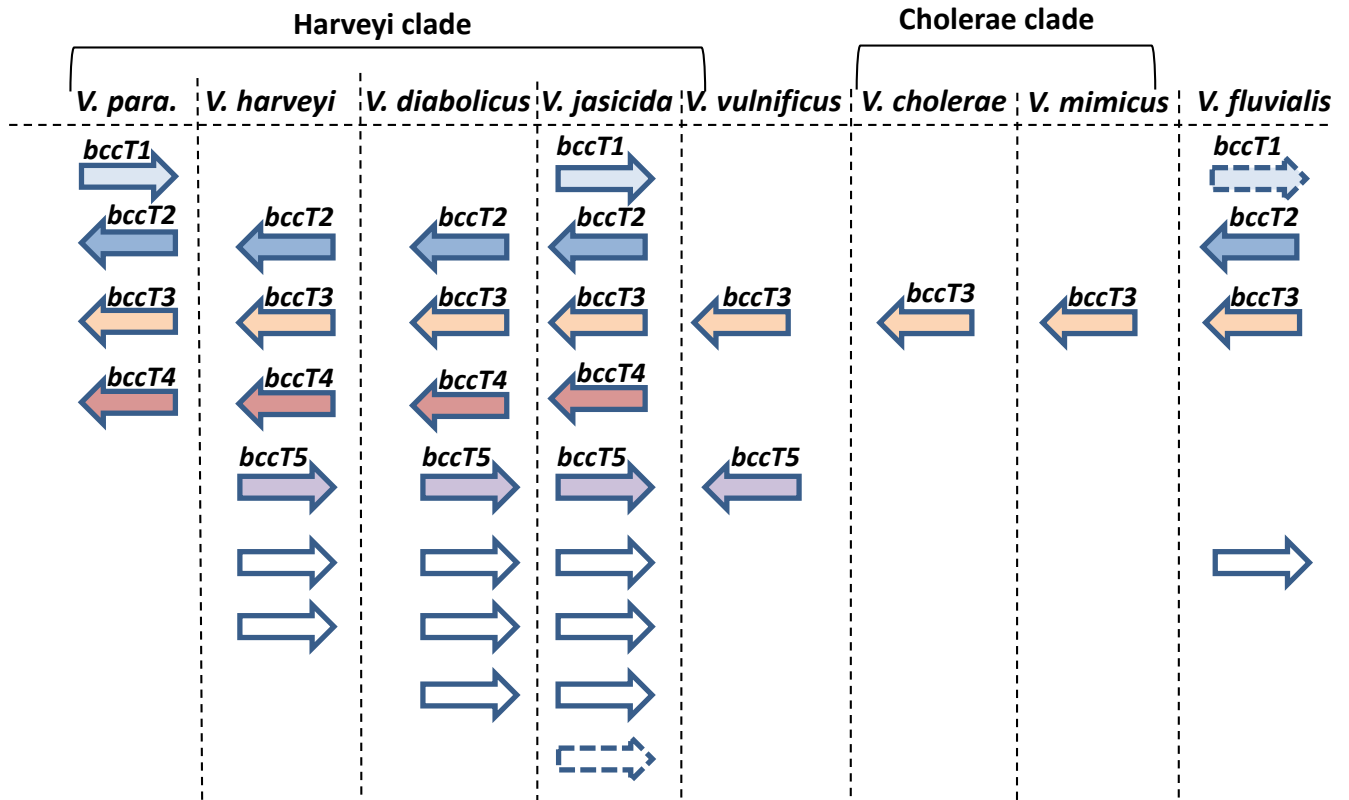

Fig. S3. Distribution of BCCT transporters among select *Vibrio* species. Arrow indicate the direction of transcription and dotted arrow indicates not present in all strains
